# Supplementary material for: Torularhodin Alleviates Hepatic Dyslipidemia and Inflammations in High-Fat Diet-Induced Obese Mice via PPARα Signaling Pathway
Source: MDPI journal article supplement (doi:10.3390/molecules27196398), 2022-09-27
Supplement: s1 [file s1]

**Table S1. The up-regulated proteins in HFD-T group vs HFD group.**

| Genes   | FC*  | Protein Name                                                         | Access number | Physiological function                                                                                                          |
|---------|------|----------------------------------------------------------------------|---------------|---------------------------------------------------------------------------------------------------------------------------------|
| Ndufs8  | 1.27 | NADH dehydrogenase [ubiquinone] iron-sulfur protein 8, mitochondrial | NDUS8_MOUSE   | Catalyzes NADH to NAD <sup>+</sup> by electron transfer in the respiratory chain ( $\beta$ -oxidation increases NAD/NADH ratio) |
| Gk      | 1.36 | Glycerol kinase                                                      | GLPK_MOUSE    | Increased glycerol kinase activity indicate increased lipid oxidation (release of glycerol)                                     |
| Apoa2   | 1.53 | Apolipoprotein A-II                                                  | APOA2_MOUSE   | A component of high density lipoproteins (HDL).                                                                                 |
| Ugt2a3  | 1.53 | UDP-glucuronosyltransferase 2A3                                      | UD2A3_MOUSE   | Make lipophilic substrates with increased water solubility favoring excretion                                                   |
| Vamp8   | 1.55 | Vesicle-associated membrane protein 8                                | VAMP8_MOUSE   | VAMP8 is a SNARE protein involved in autophagy                                                                                  |
| Sec61b  | 1.58 | Protein transport protein Sec61 subunit beta                         | SC61B_MOUSE   | Mediates transport of signal peptide-containing precursor polypeptides across the ER                                            |
| Gulo    | 1.61 | L-gulonolactone oxidase                                              | GGLO_MOUSE    | An old gene to synthesize vitamin C of L-ascorbate.                                                                             |
| Eci1    | 1.61 | Enoyl-CoA delta isomerase 1, mitochondrial                           | ECI1_MOUSE    | Involved in the fatty acid beta-oxidation                                                                                       |
| Asgr1   | 1.69 | Asialoglycoprotein receptor 1                                        | ASGR1_MOUSE   | Endocytosis of plasma glycoproteins, Asparagine N-linked glycosylation                                                          |
| Emc1    | 1.69 | ER membrane protein complex subunit 1                                | EMC1_MOUSE    | Indirectly involved in many cellular processes by regulating the insertion of various proteins into the membrane.               |
| Eci2    | 1.70 | Enoyl-CoA delta isomerase 2                                          | ECI2_MOUSE    | Involved in the fatty acid beta-oxidation                                                                                       |
| Tmem30a | 1.74 | Cell cycle control protein 50A                                       | CC50A_MOUSE   | Transport of aminophospholipids, beneficial to phospholipid balance (PS&PE) in the membrane                                     |
| Ephx1   | 1.75 | Epoxide hydrolase 1                                                  | HYEP_MOUSE    | Detoxification of toxic metabolites such as epoxide-containing fatty acids.                                                     |
| Rps10   | 1.75 | 40S ribosomal protein S10                                            | RS10_MOUSE    | Component of the 40S ribosomal subunit                                                                                          |
| Ddc     | 1.76 | Aromatic-L-amino-acid decarboxylase                                  | DDC_MOUSE     | Neuromessenger of dopamine serotonin synthesis                                                                                  |
| Pck1    | 1.87 | Phosphoenolpyruvate carboxykinase, cytosolic [GTP]                   | PCKGC_MOUSE   | Rate-limiting step in gluconeogenesis, related to glucose and lipid balance.                                                    |
| Apoa4   | 2.28 | Apolipoprotein A-IV                                                  | APOA4_MOUSE   | Apoa-IV is a structural component of HDL                                                                                        |
| Fabp5   | 2.41 | Fatty acid-binding protein 5                                         | FABP5_MOUSE   | Fatty acid binding protein family (FABP). participating in fatty acid uptake and metabolism                                     |
| Cyp7a1  | 3.20 | Cytochrome P450 7A1                                                  | CP7A1_MOUSE   | Involved in cholesterol catabolic process.                                                                                      |
| Cpt1a   | 3.85 | Carnitine O-palmitoyltransferase 1, liver isoform                    | CPT1A_MOUSE   | Involved in carnitine metabolic process; promoting fatty acid $\beta$ -oxidation                                                |
| Acaa1a  | 1.51 | 3-ketoacyl-CoA thiolase A, peroxisomal                               | THIKA_MOUSE   | Involved in fatty acid beta-oxidation in peroxisomes                                                                            |
| Acaa1b  | 2.71 |                                                                      | THIKB_MOUSE   | Fatty acid metabolic process, promote fatty acid $\beta$ -oxidation in the liver                                                |

3-ketoacyl-CoA  
thiolase B,  
peroxisomal

---

\*FC: fold changes

**Table S2. Down-regulated proteins in HFD-T group.**

| <b>Gene</b> | <b>FC*</b> | <b>Protein Name</b>                               | <b>Access Number</b> | <b>Physiological Function</b>                                                                                                                              |
|-------------|------------|---------------------------------------------------|----------------------|------------------------------------------------------------------------------------------------------------------------------------------------------------|
| Plin2       | 0.08       | Perilipin-2                                       | PLIN2_MOUSE          | Coating lipid droplet , associated with adipocyte differentiation, adipose tissue development and maintenance                                              |
| Slc27a5     | 0.36       | Bile acyl-CoA synthetase                          | S27A5_MOUSE          | Hepatic fatty acid uptake and bile acid re-conjugation and recycling                                                                                       |
| Slc27a4     | 0.38       | Long-chain fatty acid transport protein 4 (FATP4) | S27A4_MOUSE          | Principal fatty acid transporter in small intestinal enterocytes                                                                                           |
| Fabp1       | 0.42       | Fatty acid-binding protein, liver                 | FABPL_MOUSE          | Lipoprotein-mediated cholesterol uptake in hepatocytes                                                                                                     |
| Fabp2       | 0.42       | Fatty acid-binding protein,intestinal             | FABPI_MOUSE          | Long-chain fatty acid transport, and intestinal lipid absorption                                                                                           |
| Asl         | 0.45       | Argininosuccinate lyase                           | ARLY_MOUSE           | L-arginine biosynthesis and urea cycle                                                                                                                     |
| Sorbs1      | 0.57       | Sorbin and SH3 domain-containing protein 1        | SRBS1_MOUSE          | Sertoli-Sertoli Cell Junction Dynamics pathway, involved in insulin-stimulated glucose transport, and formation of actin stress fibers and focal adhesions |
| Vnn1        | 0.57       | Pantetheinase                                     | VNN1_MOUSE           | Recycling pantothenic acid (vitamin B5) and releasing cysteamine and involved in cell proliferation                                                        |
| Ppm1k       | 0.57       | Protein phosphatase 1K, mitochondrial             | PPM1K_MOUSE          | Regulates the mitochondrial permeability transition pore and promote branched-chain amino acid catabolism                                                  |
| Glod4       | 0.60       | Glyoxalase domain-containing protein 4            | GLOD4_MOUSE          | Metalloenzyme in the glycolytic pathway involved in the detoxification of reactive methylglyoxal into d-lactate using glutathione (GSH) as cofactor        |
| Me1         | 0.61       | NADP-dependent malic enzyme                       | MAOX_MOUSE           | Energy providers (through generating NADPH) for fatty acid synthesis                                                                                       |
| Plin5       | 0.63       | Perilipin-5                                       | PLIN5_MOUSE          | Coat lipid droplet, maintain lipid droplet homeostasis by regulating both the lipid storage and fatty acid oxidation                                       |
| Plin4       | 0.73       | Perilipin-4                                       | PLIN4_MOUSE          | coat intracellular lipid storage droplets                                                                                                                  |

\*FC: fold changes vs HFD group.

**Table S3. Inflammation-associated proteins in HFD-T group. .**

| <b>Gene</b> | <b>FC*</b> | <b>Protein</b>                                      | <b>Access No.</b> | <b>Function</b>                                                              |
|-------------|------------|-----------------------------------------------------|-------------------|------------------------------------------------------------------------------|
| Gsdmd       | 2.16       | Gasdermin-D                                         | GSDMD_MOUS<br>E   | Immune defense and pyroptosis                                                |
| Fas         | 1.63       | Tumor necrosis factor receptor superfamily member 6 | TNR6_MOUSE        | TNF-receptor involved in cell apoptosis                                      |
| Bax         | 1.56       | Apoptosis regulator BAX                             | BAX_MOUSE         | Programmed cell death                                                        |
| Icam1       | 1.55       | Intercellular adhesion molecule 1                   | ICAM1_MOUS<br>E   | Resolution of inflammatory conditions.                                       |
| Ocln        | 1.41       | Occludin                                            | OCLN_MOUSE        | Cytokine can reduced its expression                                          |
| Gstp1       | 1.33       | Glutathione S-transferase P 1                       | GSTP1_MOUSE       | Suppress LPS induced pro-inflammatory factors                                |
| Faf1        | 1.27       | FAS-associated factor 1                             | FAF1_MOUSE        | Apoptosis by interacting with the Fas receptor                               |
| Optn        | 0.79       | Optineurin                                          | OPTN_MOUSE        | Negative regulation of NF-kappaB signaling                                   |
| Ptk2b       | 0.62       | Protein-tyrosine kinase 2-beta                      | FAK2_MOUSE        | Macrophage and sites of inflammation                                         |
| Fadd        | 0.60       | FAS-associated death domain protein                 | FADD_MOUSE        | Involved in inflammatory effects                                             |
| Mif         | 0.54       | Macrophage migration inhibitory factor              | MIF_MOUSE         | A lymphokine involved in inflammation                                        |
| Casp3       | 0.43       | Caspase-3                                           | CASP3_MOUSE       | Apoptosis, necrosis and inflammation.                                        |
| Yap1        | 0.41       | Transcriptional coactivator YAP1                    | YAP1_MOUSE        | Transcription of the inflammatory cytokine IL-1 $\beta$                      |
| Lrp1        | 1.37       | Low-density lipoprotein receptor-related protein 1  | LRP1_MOUSE        | Suppressor expression of inflammatory mediators                              |
| Apex1       | 1.91       | DNA endonuclease                                    | APEX1_MOUS<br>E   | Promotes inflammation by orchestrating the NF- $\kappa$ B                    |
| Rock1       | 1.47       | Rho-associated protein kinase 1                     | ROCK1_MOUS        | Suppressor of inflammatory cell migration (negative)                         |
| Manf        | 1.61       | Mesencephalic astrocyte-derived neurotrophic factor | MANF_MOUSE        | Inhibiting Inflammation by negative transcriptional effect on NF-kB Pathway  |
| Stat3       | 1.41       | Signal transducer and activator of transcription 3  | STAT3_MOUS<br>E   | Anti-inflammatory (regulate gene expression)                                 |
| Dnm11       | 0.66       | Dynamin-1-like protein                              | DNM1L_MOUS        | Promote inflammation by AKT/IKK/NFKBIA/NF- $\kappa$ B NAD immunometabolism , |

|       |      |                                               |                          |                                                        |
|-------|------|-----------------------------------------------|--------------------------|--------------------------------------------------------|
| Nampt | 0.63 | Nicotinamide<br>phosphoribosyltrans<br>ferase | E<br>NAMPT_MOUS<br>E     | promoting gut inflammation<br>Anti-inflammation        |
| Insr  | 1.99 | Insulin receptor                              |                          | Detoxification of toxic                                |
| Ephx1 | 1.75 | Epoxide hydrolase 1                           | INSR_MOUSE<br>HYEP_MOUSE | metabolites such as epoxide-<br>containing fatty acids |

---

\*Fold changes compared to the HFD group.
